# Supplementary material
Source: PubMed Central journal article supplement (PMC8930615)

**A**

Behavioral / Fiber Photometry Experiments :

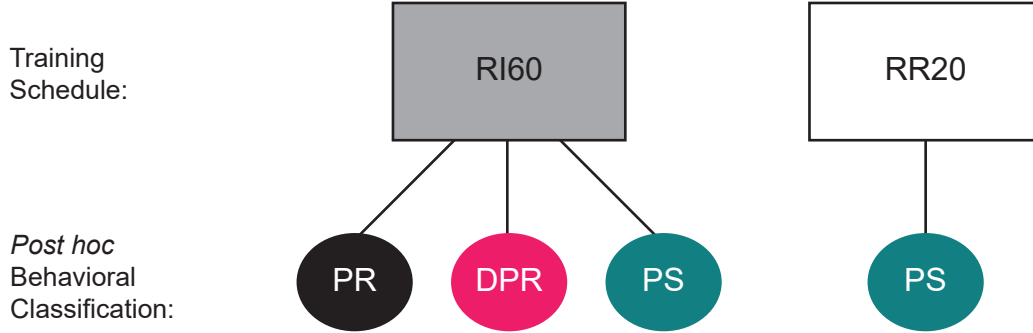

**B**

Optogenetics Experiments :

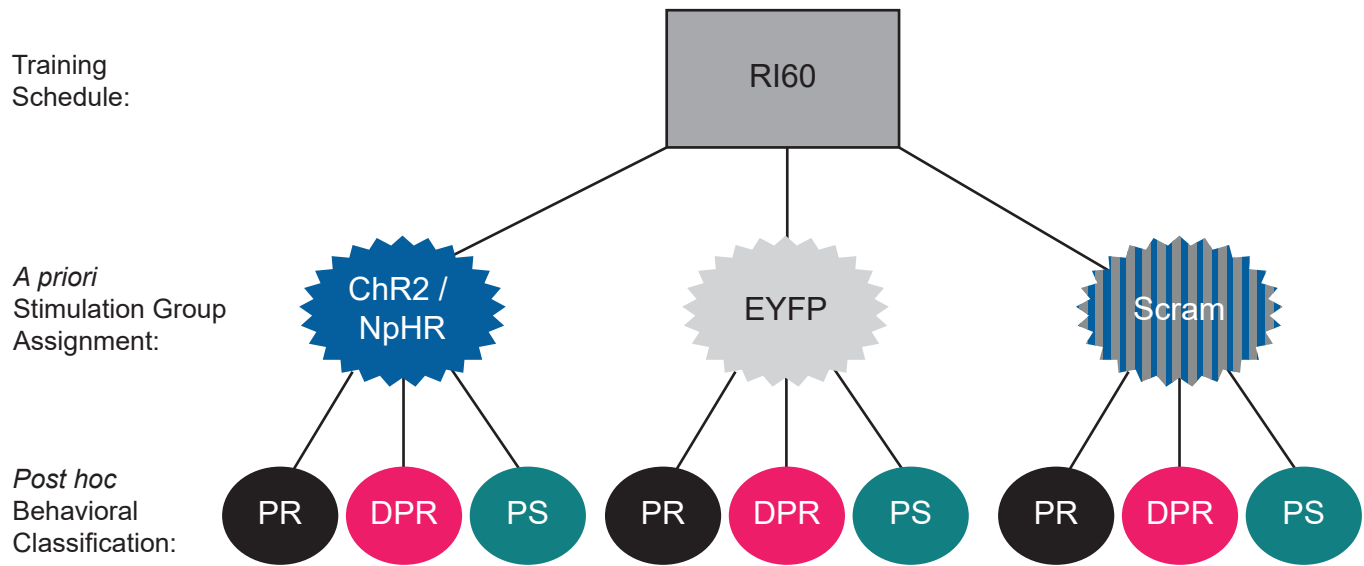

Supplement: NIHMS1775870-supplement-2.pdf [file NIHMS1775870-supplement-2.pdf]
